# Supplementary material for: Implementation and application of Ensemble Optimal Interpolation on an operational chemistry weather model for improving PM 2.5 and visibility predictions
Source: Copernicus journal article supplement (doi:10.5194/gmd-2022-207), 2022-11-07
Supplement: Supplementary file [file gmd-2022-207-AC2-supplement.pdf]

Dear referee,

We are very grateful for your professional, helpful suggestions and guidance on our manuscript. They are invaluable for us to improve the quality of our paper. We have carefully studied all your comments and have made corresponding revisions. Here are our responses and revision details. The Reviewer's comments are in black and our responses are in blue. All line numbers correspond to the revised version with markers.

Sincerely,

Siting Li and co-authors

### **General comments**

The data assimilation scheme described in this paper is well-known and the interesting points are its adaptation to the application to PM<sub>2.5</sub> and visibility in a large domain, China, with very contrasted concentrations both in time and in space. Therefore, such a topic is relevant for publication in GMD. Nevertheless, I am not convinced that the work described here actually brings anything new or state-of-the-art regarding data assimilation for air quality forecast.

**Response:** Thank you for your affirmation and we are sorry that we did not present our ideas and results with remarkable clarity in the former version of our manuscript. According to your comments and suggestions, we have made corresponding revisions. The major revisions to this manuscript are:

- rewrite the introduction
- conduct more experiments with only 50% observations to be assimilated by EnOI and evaluate the impact of DA against the non-assimilated sites in sensitivity experiments as well as cyclic DA experiments. The accuracy of the forecast or analysis through DA method is measured by model-observation agreement mainly using RMSE and CORR as metrics and the improvement by EnOI is represented by reduction of RMSE, MB or enhancement of CORR. These results are presented in Table 3,4,5 and Figure 5,7 in revised manuscript.
- We have given specific descriptions or data to support the qualitative statements that appear in the manuscript
- In Section 3.4.1 impact on PM<sub>2.5</sub> forecast, we add comparison between our results and previous paper. The results in our study show that using EnOI to assimilate ground-based PM<sub>2.5</sub> observations for the model chemical initial field can reduce over 9.8% of RMSE for 24h forecast in average. Park et al. (2022) implemented an ensemble Kalman filter (EnKF) in the Community Multiscale Air Quality model (CMAQ model v5.1) for data assimilation of ground-level PM<sub>2.5</sub>. They found using EnKF with 40 ensemble number can reduce 9% of RMSE for 24h forecast. Comparing their results with ours, we can find that, while EnOI is sub-optimal, it can give improvement of forecast that are comparable to those of the EnKF. Moreover, the computational cost of EnOI is typically about N times less than that of EnKF. Therefore, we suggest that EnOI may provide a practical and cost-effective alternative to the EnKF for the applications where computational cost is a main limiting factor, especially for real-time operational forecast.

The introduction to the paper does not give all the required information e.g. definitions of "haze period"

(1.37), "the forecast accuracy of air quality forecasting" (1.46), "advantageous" (1.68) are not defined, nor are the terms directly referring to the method such as "spatial length scale of the covariance localization" (1.70); it is not always clear if the references are relevant: they must not be cited as lists of works but each of them must be linked to an aspect of the topic of the paper; conversely, references seem to be missing e.g. "4D-Var requires coding the adjoint model, which is difficult to perform for complex systems": true, but it has been done nevertheless, even for PMs.

**Response:** we basically rewrite the introduction and delete the references which are not relevant and give explanation for specific terms.

In Section 2, the presentation of the EnOI is not very clear regarding which parts are the well-known mathematical method and which are the contributions of this work. For example, 1.118 "To avoid all observations affecting the same model grid,...": why should it be an issue? It generally is not, it may be quite the reverse. Other examples include values which are assigned to parameters without any explanation such as "alpha is taken as 0.9 in this study" (1.115) or "the time step is 100s" (1.164).

**Response:** A brief recall of the EnKF and EnOI is given in Section 2.1 (Lines 169 to 204 in the revised manuscript) based on the work of Evensen (2003), and the EnOI data assimilation system we have developed is given in Section 2.2. (Lines 205 to 233 in the revised manuscript). 1.118 "To avoid all observations affecting the same model grid,...]" is an issue when the observations number is large, this was explained in Evensen (2003) Section 4.3.1 Eq.55 and Section 4.4. We have added explanation to the parameter such as alpha (Lines 199 to 203 in the revised manuscript) and time step (Lines 286 to 287 in the revised manuscript).

In Section 3, the sensitivity experiments are not designed in a very convincing way. The case with only two sites is more a pedagogical illustration than a result or proof. Some possibilities are not explored or even discarded with an explanation: for example, why not adapt the localization length-scale to the representativeness of each station? Why don't we obtain the expected conclusion on the size of the ensemble i.e the larger the ensemble, the better the results of the DA in Section 3.2? The aim of Section 3.3 is not very clear: the first paragraph seems to be dedicated to evaluating the impact of DA against non-assimilated sites but the following ones seem to use all sites for DA (1.261). Therefore, the results showing the impact of DA are trivial: the assimilation is designed to obtain better statistics at the assimilated sites; they just show that there is not an obvious bug in the implementation. The comments on the 40-km length scale and the "discrete" aspect of the posterior field are a bit strange. Obtaining such a result suggests that the spatial resolution of the model (what is it?) is not relevant compared to the representativity of the measurements. This can be linked to the issue of the "overlapping" of the influence areas of sites. If the corrections for each site are independent from the others, then the reasoning in term of "field" (i.e. continuous mapping) is not really valid. The impact on forecasted concentration fields and visibility are not presented in a clear enough way to be convincing. This is linked to the above remarks, also to the ones in the Specific comments, but mainly to the lack of information of what is aimed at for the forecast: is the aim to get better scores about peak detection / visibility loss forecasting? To avoid false positive? False negative? Moreover, the possibilities of a simpler correction of the initial field or improvements to the model are not discussed.

**Response:** Yes, the case with only two sites is more a pedagogical illustration. We want to use these two sites to give a visual representation of how individual sites are assimilated and how the analytical incremental fields are distributed after localization. We think this will help the reader to visualize how

individual sites affect the model background field and how our EnOI localization scheme updates the analyzed field. The site representativeness was considered through the observation error covariance matrix R, which has been added in Section 2.2(Lines 214 to 219 in the revised manuscript). Regarding the sensitivity test design you mentioned, we conduct the experiments again, this time with 50% observation to be assimilated in sensitivity experiments as well as cyclic DA experiments, and evaluate the impact of DA against non-assimilated sites (Lines 333 to 336 and Lines 383 to 385 in the revised manuscript).

The comments on the 40-km length scale and the "discrete" aspect of the posterior field are not relevant, so we delete it. The impact on forecasted concentration fields has been investigate more carefully in Section 3.4.1(Lines 364 to 550 in the revised manuscript). The aim of our work is employing EnOI to make initial condition of PM<sub>2.5</sub> closer to the observations and then improve the forecast of PM<sub>2.5</sub> and further lead to visibility simulation more consistent with the observation. This is the first step. In the following work, we will employ EnOI to update the emission and relative humidity. 3DVar or simpler correction may be not suitable to do this work.

Several important remarks on the way the text is written may explain why it is not convincing to the reader:

- please avoid using "etc": either provide the full information or indicate in the sentence that it's only the most recent/most relevant examples which are given.

**Response:** Thank you for your suggestion, we should provide as much specific and effective information as possible in our writing, and we have removed all the "etc" in the manuscript.

- please don't use any phrase such as "it is obvious that" (l.258), "is evident" (l.283). Nothing is obvious or evident that is not trivial in a scientific paper.

**Response:** Thanks for your advice. As you mentioned, nothing is evident in science, and we try to explain them concretely. Line 425 and line 462 in the revised manuscript were deleted.

- qualitative statements do not bring actual information: what is an "unreasonable result" (e.g. l. 234)? What does "significantly" mean here (e.g. l.240, l.258)? What is "light" or "heavy" pollution (l.265-266)?

**Response:** Thank you very much for your question, we are aware of the importance of quantitative descriptions in scientific papers. We have given specific descriptions or data to support the qualitative statements that appear in the manuscript. Mass concentration limit of PM<sub>2.5</sub> and its corresponding air quality level have been given in Table 1, based "Ambient air quality standards" (GB 3095-2012) of China. 24-h PM<sub>2.5</sub> concentration between 75 and 115 μg m<sup>-3</sup> corresponds to "light pollution " and PM<sub>2.5</sub> concentration between 150 and 250 ug m<sup>-3</sup> corresponds to "heavy pollution"

| PM <sub>2.5</sub> concentration limit (ug m <sup>-3</sup> ) | Air quality description | level | API     |
|-------------------------------------------------------------|-------------------------|-------|---------|
| 35                                                          | excellent               | I     | 0-50    |
| 75                                                          | good                    | II    | 51-100  |
| 115                                                         | light pollution         | III   | 101-150 |
| 150                                                         | moderate pollution      | IV    | 151-200 |
| 250                                                         | heavy pollution         | V     | 201-300 |
| >250                                                        | hazardous pollution     | VI    | >300    |

- please justify why so many significant numbers are provided, in particular for statistical indicators

such as MB, ME, RMSE - or stick to a meaningful rounding.

**Response:** we have revised the numbers in the manuscript and uniformly rounded MB, ME and RMSE to retain one decimal places, rounded CORR to retain two decimal places

The legends of the Figures are not detailed enough: several do not contain all the information required to understand what is shown without looking up in the text which color is which variable or what an acronym means.

**Response:** The legends of the figure we have performed a complete description. We have also removed the redundant description in the body part of the manuscript. Thank you very much for your guidance. Your summary of the reasons why this paper was not very convincing to the readers really helped us a lot, and it directly reflects the problems in our writing process. These details of the manuscript writing process are also the basis of our scientific research, and we will carefully revise them point by point according to the reviewers' comments. **Lines 861 to 863, lines 861 to 863, lines 880 to 882, lines 895 to 898 and lines 931 to 938 in the revised manuscript.**

### **Specific comments**

Introduction

- 1.37: what is "the haze period"?

**Response:** "the haze period" means " the haze episode" 。 A haze episode is an atmospheric phenomenon characterized by significant growth in the concentration of aerosol particles and sharp reduction of visibility. We have added the above explanation in the manuscript. **Lines 45 to 46 in the revised manuscript**

- 1.39: please detail the "etc": health?

**Response:** 'etc' is weather and climate. The original content has been deleted and rephrased. **Lines 49 to 50 in the revised manuscript**

1.44-45: "a deviation of air quality forecast results from observed comparisons, which can reach 30-50%": which results compared to which measurements can lead to a difference of 30 to 50% (and not -30 to -50%)? Do you compare PM<sub>2.5</sub> concentrations? Visibility? Other variables?

**Response:** We emphasize the comparison between model forecasts and ground-based observations. Zheng (2015) found that CMAQ model evaluation against ground-based measurements using normalized mean biases showed underpredictions of PM<sub>2.5</sub> mass concentration by 21.9 % in a pollution simulation experiment on North China. Peng (2020) found in a numerical simulation experiment for China in January 2017 that the model significantly overestimates the visibility degradation, where the overestimation is 48% during the study period. Both of them are case study, and we should not draw a concluding simply (30-50%) from these case study, so we have deleted this phrase in the text. **Lines 56 to 57 in the revised manuscript**

- 1.46: " the forecast accuracy": what is intended here: to forecast concentrations of PM<sub>2.5</sub> and/or visibility or to forecast air quality in terms of peaks and other indicators? The "accuracy" is not the same depending on what is intended.

**Response:** We are referring to PM<sub>2.5</sub> concentration and visibility forecasts. The accuracy of the forecast or analysis through DA method is measured by model-observation agreement mainly using RMSE and

CORR as metrics and the improvement through DA method is represented by reduction of RMSE or enhancement of CORR. This kind of estimation method has generally been used in many previous studies.

- 1.54: what is in "etc"?

**Response:** "etc" represents the ensemble variational method, local ensemble transformation Kalman filtering method. It has been deleted according to the following advice. **Line 66 in the revised manuscript**

- 1.50 to 61: Avoid lists of methods and references if there is no message relevant to the topic of the paper to be derived from them.

**Response:** we have deleted them all. **Lines 66 to 73 were deleted and rewritten in lines 73 to 93 in the revised manuscript.**

- 1.62-63: "which is difficult to perform for complex systems": it has nevertheless be done once or twice, please look up the references.

**Response:** Yes, 4D-Var has been successfully implemented as a mature assimilation technique on atmospheric chemistry models and has improved the PM forecasting capability. For example, Zhang et al. (2016) constructed a GEOS-Chem adjoint model suitable for fine particle (PM<sub>2.5</sub>) pollution diffusion based on 4DVAR algorithm, which was verified by the monitoring data of APEC in Beijing in 2014. Zhang et al. (2021) built a PM<sub>2.5</sub> data assimilation system based on the 4DVar algorithm and the WRF-CMAQ model, which can assimilate synchronous observations simultaneously to improve aerosol prediction accuracy. We have added the above references in the introduction. **Lines 82 to 87 in the revised manuscript**

- 1.68: "which is an advantageous data assimilation method": advantageous with regards to what? Practical implementation? Computing time and/or power? Why is it not always used (eg what about non-linear problems, such as is the case here)?

**Response:** The "advantage" here refers to the fact that the EnKF has the flow-dependent background error covariance and does not require the writing of an adjoint model compared to the variational method. This is easier to implement in practice, and in this respect, the EnKF is "advantageous". The EnKF has proven its efficiency in strongly nonlinear dynamical systems but is demanding in its computing power requirements, which are typically about the same as those of the 4DVAR systems. This is the reason for not using EnKF in this study. the GRAPES\_Meso5.1/CUACE chemical weather model, which is very computationally intensive, we believe that the assimilation of the initial field of the model should not consume too many computational resources when this model is actually applied to operational forecasting.

- 1.69-75: too many terms which are not defined before, not adapted to an introduction.

**Response:** Thanks for the reminder. This part has been deleted and we will avoid that problem. **Lines 109 to 116 in the revised manuscript**

1.79: "the CTMs are strongly non-linear systems and the assumption of Gaussain variables and non-biased do not apply": 1) the sentence is not clear, at least one word is missing after "non-biased" and "variables" is not clear (shouldn't it be errors??) 2) it looks like the linearity and the Gaussian

assumption are linked, which is not the case.

**Response:** Yes, there is an error in this sentence. The exact one should be “and the assumptions of non-biased and Gaussian variables do not apply.” Linearity and Gaussian distribution are not related. We have deleted it. **Lines 117 to 118 in the revised manuscript**

- 1.85-86: "which makes the computation greatly reduced": at least one work is missing: the computation time?

**Response:** Yes, it is computation time. **Line 125 in the revised manuscript**

- 1.90: "still relatively rare": not very precise, it's been done in the past; also, explain why this is the case: are there any drawbacks? Which are they? Or maybe it's not efficient?

**Response:** Yes, it has been done in the past. To our knowledge, there are only several papers involved researches of EnOI in atmospheric chemistry models so far. Zhang et al. (2014) implement the EnOI on an air quality numerical modelling MM5-STEM for the Pearl River Delta region in China. They found that EnOI produced the initial condition closer to the true situation, but they didn't investigate the effect of EnOI on forecast. Wang et al. (2016) used EnOI to investigate the possibility of optimally recovering the spatially resolved emissions bias of black carbon aerosol. Kong et al. (2021) applied EnOI to assimilate hourly surface observations of CO concentrations at 1107 sites over China in January 2015. Simulations with the updated emissions revealed a decrease bias of average CO concentrations at 349 independent validation sites from  $0.74 \text{ mg m}^{-3}$  to  $0.01 \text{ mg m}^{-3}$  and a reduction of the RMSE by 18%. Results from these papers showed that EnOI is a useful and computation-free method to reduce the errors of initial chemical condition or emissions. However, none of them applied EnOI for real-time air quality forecast. We have added these sentences in the manuscript. **Lines 130 to 136 in the revised manuscript**

EnOI is not frequently used in atmospheric chemistry models because scientists of air quality focused more on the advanced data assimilation like 4D-Var or EnKF. However, as CCMM is becoming more complicate, scientists realizes that even 3D-Var algorithm or OI are still attractive, especially in the operational environment. Ha et al. (2022) used 3D-Var for WRF-Chem. The drawback of EnOI is that traditional EnOI ensemble samples come from long-time model integrations, atmospheric chemistry is a fast-varying process, and samples from long-time integrations do not provide a good estimate of the model background error. However, EnOI can not only update the initial field for the model but also inverse the emission, which is very important for air quality model. Our work in this manuscript is only first step to use EnOI in CCMM. In the future, we will work on fast update aerosol emission using EnOI for operational forecast.

- 1.92: same remark as before about the "forecast accuracy" but is it all the more crucial here that the assessment of the results depend on this definition.

**Response:** Thank you for this question. After considering your suggestion, we consider that the term "forecast accuracy" does not fit here and that "forecasts of the concentrations of  $\text{PM}_{2.5}$ " might be more appropriate. **Line 147 in the revised manuscript**

## Methods and Data

Generally, in this section, the difference between the well-known mathematics of the method and the choices made for this particular study must be made clearer.

**Response:** We have made the well-known mathematics in Section 2.1 (Lines 196 to 204 in the revised manuscript) and the Section 2.2 (Lines 205 to 233 in the revised manuscript) describes the methods of this study.

- Eq.1: the notation used for H indicate that it is considered linear. But 1.79, it is stated that the case studied here is strongly non-linear - which is what is expected with PMs. An explanation of why assuming H to be linear is justified is required.

**Response:** In 1.79, the term "non-linear" means that the atmospheric chemistry model is non-linear. H refers to observation operator, which in this study, is the linear mapping from the model grid to measurement sites for PM<sub>2.5</sub> concentrations. The ground-based observed PM<sub>2.5</sub> is the same species as the initial field PM<sub>2.5</sub>, and an approximate linear relationship can be established that allows the model grid data to correspond directly to the station data, so the observation operator H in Eq. 1 is linear.

- please ensure that all notations and acronyms are defined at the first use. Example: AF 1.113.

**Response:** We have eliminated all abbreviations for phrases that appear more frequently in this article but are less than three words long.

- 1.115: "(0,1)": why (? Shouldn't it be)?

**Response:** According to Evensen(2003),  $\alpha$  is the parameter giving different weights for the forecast and measurement error covariances, which can be adjusted to the size of the covariance for a specific application. The variance of a stationary ensemble over a long period usually overestimates the instantaneous variability; therefore  $\alpha < 1$ . If it's 0, there will be no assimilation effect. Lines 199 to 204 in the revised manuscript

- 1.115: "alpha is taken as 0.9 in this study": why?

**Response:** The parameter alpha is variable which mainly depends on how the model forecast behaves. In our study, it is taken as 0.9 from our experience. We have set it as 0.6, 0.7, 0.8, 0.9 and 1, and compare the RMSE of analysis and forecast PM<sub>2.5</sub>, and find when it is set as 0.9, we get the smallest RMSE of analysis and forecast PM<sub>2.5</sub>. But for others who use different model, it may be set as different value. It can be tuned for optimal performance and modified easily. Lines 202 to 203 in the revised manuscript

- 1.118: the localization scheme is not part of the general method. A explanation of why it is needed, and stating its formulation and link with the previous equations is required, probably in a new subsection.

**Response:** Thanks to your suggestion, we have added a new Section 2.2 in the text dedicated to localization. Lines 205 to 219 in the revised manuscript

- generally, in this

- 1.119-120: "limit the influence of a single observation by the Kalman update equation[...]": this sentence is not clear for me.

**Response:** The implication of this statement is that localization allows the influence of the observations on the model to be restricted to a certain area. Our previous introduction about this part was too simple, so we removed this part and rewrote it in the revised version. Lines 206 to 213 in the revised



manuscript

- 1.124: "the observations can be reused": for what?

**Response:** The observations can be reused for different model grid point in localization analysis. The introduction to the localization analysis scheme has been rewritten. **Lines 205 to 233 in the revised manuscript**

- 1.135-137: long list of references but what is the message?

**Response:** We would like to demonstrate that the model is a well-established atmospheric chemistry model by expressing that the model is widely used in various aspects through the cited references. The latter reference is used as an explanation for the preceding "dust and haze prediction, aerosol radiation, and aerosol-cloud interactions". However, this way of citation can make it difficult for the reader to understand, so we have modified the text to make the individual references correspond to specific application areas and put these in introduction. **Lines 237 to 240 were deleted. The model introduction is added in lines 138 to 144**

- 1.143: "Etc": which processes are included in this etc?

**Response:** vertical mixing, cloud chemistry, and coagulation and activation of CCN from aerosols. Are included in "Etc". We have completed it. **Lines 258 to 259 in the revised manuscript**

- 1.155: which sectors are included in the "etc"?

**Response:** We have expressed it completely and deleted "etc". **Line 277 in the revised manuscript**

- 1.164: "the time step is 100s": why this choice?

**Response:** It is found that the physical parameterization process is sensitive to the time step and the non-physical energy spurious growth of the mode kinetic energy spectrum occurs after increasing the time step. The detail of choosing time step for GRAPES\_Meso can be found in Zheng et al. (2008). The time step at which the modal kinetic energy spectrum starts to show spurious energy growth is defined as the maximum effective time step, and the relationship between the effective time step and the horizontal resolution satisfies the expression:

$$\Delta t = -27.56 + 3827\Delta\phi - 3934\Delta\phi^2, \text{ where } \Delta\phi = 0.01^\circ \sim 0.5^\circ$$

The resolution of GRAPES\_Meso5.1/CUACE is  $0.1^\circ$  (about 10km), and the maximum effective time step is calculated to be 300s in theory. We choose 100s to be the time step because of considering both model integration stability and accuracy. **Lines 286 to 287 in the revised manuscript**

- 1.179: "the missing localization": not clear, do you mean "not using a localization scheme"?

**Response:** Yes, that's what we're talking about. The expression "the missing localization" is wrong and we have deleted it. **Line 303 in the revised manuscript**

1.180: "localization was performed in selecting the optimal ensemble size": not clear what the link between localization and the ensemble size may be. Please explain.

**Response:** Since our EnOI scheme is updating the analysis at each grid point simultaneously using the state variables and the observations, every time EnOI is done, localization is performed as well. This sentence has been deleted. **Lines 303 to 304 in the revised manuscript**



## Results and discussion

- 1.191-205: this two-site case is interesting as a pedagogical illustration but does not seem very relevant for the case study.

**Response:** These two sites are the results of our single-point experiment. We want to use these two sites to give a visual representation of how individual sites are assimilated and how the analytical incremental fields are distributed after localization. We think this will help the reader to visualize how individual sites affect the model background field and how our EnOI localization scheme updates the analyzed field.

- 1.206: "the initial fields from 15 to 23 December 2016 were performed": not clear, DA is performed on these fields?

**Response:** Yes, the initial field at 0000 UTC each day from December 15-23 was assimilated and we have rephrased it. In conjunction with the first reviewer's comments, we extended the sensitivity test to December 2016, and the assimilation test was performed on the initial field at 0000 UTC. throughout the month of December 2016. **Lines 333 to 334 in the revised manuscript**

- 1.208: "means that more the simulation is closer to the observation": broken English.

**Response:** Deleted. **Lines 338 to 339 in the revised manuscript**

- 1.210: "[...] of the DA experiment are smaller that those of the CR": it is not clear if the statistical indicators are computed against to the validation sites or against assimilated sites. If it is the later, then the results are trivial.

**Response:** Following your suggestion, we assimilated 50% observation and evaluate the statistical indicators against the non-assimilated site. **Lines 334 to 336 in the revised manuscript**

- 1.219: what are "spurious increments"? How are they detected?

**Response:** "spurious increments" are caused by spurious correlation in background error variance matrix (BEC) calculated by finite ensemble member. It is difficult to detected them very precisely since it is hard to know the exact true BEC. Houtekamer and Mitchell (1998) investigated the problem of spurious corrections by comparing global correlations calculated from the ensembles of background fields with different ensemble number. They used Fig.6 to illustrated this behavior and examine the RMSE of different configurations. They found that with larger ensemble number and an influence cut-off radius in BEC can make a marked reduction in the correlations at large distances and removes the effect of remote observations. In our study, we also evaluate the RMSE or CORR between the analysis state and the observation to find which configuration (localization length-scale and ensemble) can reduce spurious increments and bring better analysis.

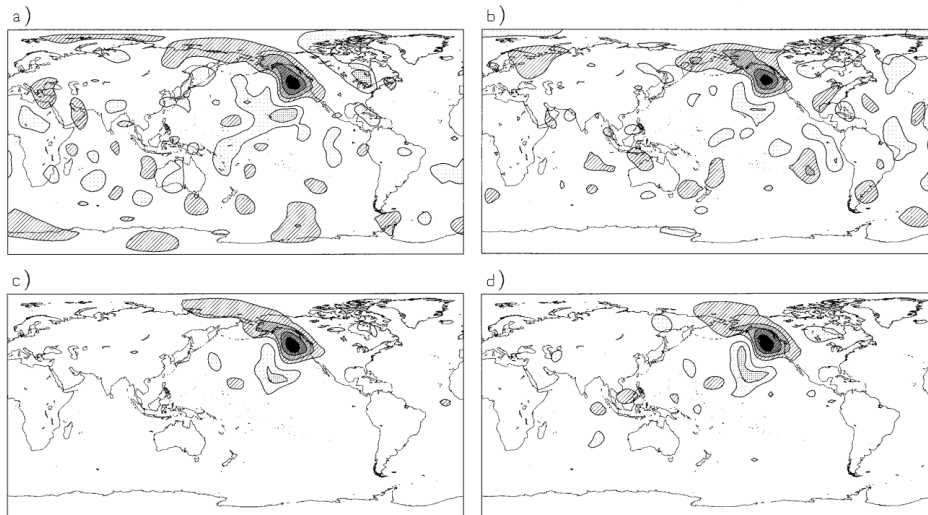

FIG. 6. Global correlation fields with respect to a point off the west coast of North America at 0000 UTC day 31. Panels (a) and (b) show the 50-kPa correlation fields for ensembles 1 and 2 when  $N = 32$  and  $r_{\max} = 20^\circ$ . Panels (c) and (d) show the corresponding fields when  $N = 128$  and  $r_{\max} = 35^\circ$ . The contours are at  $\pm 0.25$ ,  $\pm 0.50$ ,  $\pm 0.75$ , and  $\pm 0.90$ . Shading with dotted (hatched) patterns indicates negative (positive) correlations. The intensity of the shading increases as the magnitude of the correlation increases. Regions with correlations between  $-0.25$  and  $+0.25$  are not shaded.

(This figure is from Houtekamer PL, Mitchell HL. 1998. Data assimilation using an ensemble Kalman filter technique. *Mon. Weather Rev.* 126: 796–811.)

- 1.221: what is "an unreasonable initial field"?

**Response:** we mean that a not very realistic initial field which has larger RMSE or bias comparing with observations. **Line 355 in the revised manuscript**

- 1.222: concluding on the localization length-scale as the one allowing "the best assimilation" is too strong based on the previous results. What is the "best assimilation"? The one for which initial fields match the validation data? The one which provides forecast concentrations closer to validation data?

**Response:** Yes, our conclusion is too strong. Based on our test results we can only conclude that 40km is superior in the above five sets of tests. We have revised the corresponding sentences in the manuscript. **Lines 356 to 358 in the revised manuscript**

- 1.227: what is "the r field"?

**Response:** Expression error, where it refers to the field of correlation coefficients between individual sites and the ensemble sample error covariance. Modified. **Line 361 in the revised manuscript**

- 1.229-230: "the range of positive CORR at sites A and B gradually increases with the range of CORR greater than 0.7" I don't understand this sentence, please rephrase.

**Response:** Rephrased. **Lines 365 to 367 in the revised manuscript**

- 1.230: can be considered small": relative to what?

**Response:** The number of 24 and 48 is small compared to the selection of other ensemble sizes in sensitivity experiments. Modified. **Lines 367 to 368 in the revised manuscript**

- 1.232: "which exaggerates the correlation of each area": what does "exaggerates" means here? Overestimates? The correlation of each area with what?

**Response:** "exaggerates" means overestimates the correlation of each area with the model background error covariance. Deleted. **Lines 369 to 370 in the revised manuscript**

- 1.234: what are "unreasonable results"?

**Response:** Refers to the overestimation or underestimation of the initial field. Removed. **Lines 371 to 372 in the revised manuscript**

- 1.240: "changed significantly": 1) define "significant" for each statistical indicator here; 2) if the statistics are computed against sites used in the DA, the result is trivial.

**Response:** Thank you for your suggestion. In the original manuscript we assimilated all the sites and then compared them with the assimilated site calculation statistics. After considering your suggestion, we redid the experiment. In combination with the first reviewer's comments, in the new trial, we assimilated all 0000 UTC initial fields from December 1 to 31, 2016. After assimilating the assimilated sites in Figure 2, the statistics of the validation verification sites were calculated. The most reasonable ensemble size in the ensemble size sensitivity experiment was determined by considering the statistics of both validation sites. The results obtained we summarize in Table 4. **Lines 383 to 394 in the revised manuscript**

- 1.240-245: put numbers in a Table.

**Response:** Revised. Put numbers in Table 4. **Line 845 in the revised manuscript**

- 1.247-248: the expected result would be that the larger the ensemble, the better the results. Why this is not the case must be explained

**Response:** We consider the main reasons are as follows.

1. The atmospheric chemistry model used in the study is coupled online with the mesoscale regional weather model GRAPES\_Mese5.1. Mesoscale regional weather models differ from climate models and global models in that the mesoscale models represent weather systems on time scales of one to several days(Emanuel, 1986).
2. Atmospheric chemical processes are fast-varying processes with small time scales compared to climatic and oceanic processes. So, using model results from long-time integrations as ensemble may average out the "error of the day" and will not be a very good assessment of model background errors.

In summary, it is not the case that more ensemble samples are better for assimilation in this study. We have added the corresponding explanation in the revised version. (Perhaps in future research work, we can summarize the historical pollution processes as ensemble samples for comparison with this study, in order to better investigate the ensemble size in the assimilation of atmospheric chemistry models). **Lines 397 to 404 in the revised manuscript**

- 1.258: "it is obvious that": please avoid this kind of phrase, everything must be demonstrated.

**Response:** Thank you very much for your suggestion. We have deleted this wrong phrase in the text, and we will avoid such sentences in our future scientific work. **Line 425 in the revised manuscript**

- 1.258: what is "significant" for a correction of the initial field?

**Response:** It has been deleted, and we will reduce this qualitative description and use quantitative explanations to reflect the scientific results. **Line 425 in the revised manuscript**

- 1.260: "affects other areas": that is the role of the localization length-scale, isn't it?

**Response:** Yes, this is exactly what happens when the localization is implemented.

- 1.265: "BF, AF< AFI": please ensure all abbreviations are defined at the first occurrence.

**Response:** Corrected. Lines 434 to 435 in the revised manuscript

- 1.265-266: please define "light" and "heavy" pollution. Are there official thresholds involved?

**Response:** Thank you for pointing out the problem. Based “Ambient air quality standards” (GB 3095-2012) of China, the mass concentration limit of PM<sub>2.5</sub> and its corresponding air quality level and air pollution index (API) are shown in Table 1. We add that explanation in Section 2.4. Lines 266 to 269 in the revised manuscript

- 1.270: "after assimilating the BFs": strangely put. Usually, it's more relevant to explain which observations are assimilated.

**Response:** Thanks for the reminder. We have revised it to "after assimilating the ground-based PM<sub>2.5</sub>". Lines 443 to 444 in the revised manuscript

- 1.270-271: "the AFs PM<sub>2.5</sub> concentration distribution changes from sheet-like to discrete, which is due to the update of the model data in a length-scale of 40 km range": as stated in the General Comments, this looks like a discrepancy between the use of a large modelled domain (with what horizontal resolution?) and a comparatively short localization length. Please justify fully.

**Response:** The model used in the study has a horizontal resolution of 10 km and a positioning radius of 40 km, which corresponds to 4 x the grid spacing. What we want to say here is that the assimilated analysis field does not have a large area with the same PM<sub>2.5</sub> concentration as in the control experiment, but the concentration becomes different in each area. Perhaps the word "discrete" may cause misunderstandings among readers, so we will rephrase the phrase. Lines 444 to 445 in the revised manuscript

Regarding the reference in the General Comments to “If the corrections for each site are independent from the others, then the reasoning in term of "field" is not valid.” We have calculated that the average distance between PM<sub>2.5</sub> stations in each city in China is between 5 km and 50 km, and average distance is 25 km. Therefore, when the localization length-scale of 40 km is chosen, the sites can be affected by others.

- 1.274-276: this sentence is not complete, please re-write.

**Response:** Rewritten in the manuscript. Lines 449 to 451 in the revised manuscript

- 1.277-282: please summarize the results in a Table so that the text is easier to read. Beware also of the number of significant numbers!

**Response:** summarize the results in Table 5. Line 850 in the revised manuscript

- 1.282-283: “The results show that the correction effect of DA on the initial fields is evident”: 1) nothing is evident or 2) if it is evaluated against assimilated sites, it is trivial.

**Response:** 1) We have made corrections in the manuscript. 2) Improvements to the initial field This part we originally evaluated against assimilated sites, and based on your suggestion, we have now

redone the experiment to assimilate only 50% of the observation sites and evaluate the statistics of the validation sites. The results of the experiment are put in Figure 5 and Table 4. **Lines 497 to 515 in the revised manuscript**

- 1.286-289: the sentence is too long.

**Response:** We have split this long sentence into three sentences in the manuscript. **Lines 497 to 500 in the revised manuscript**

- 1.289-291: please put the information about which color is what in the legend of the Figures. The same applies below in the section.

**Response:** Thanks to your suggestion, we deleted the color information in the manuscript and described the legend of the Figures in detail.

- 1.291: “relatively consistent in (20)”: I don’t understand, please rephrase

**Response:** rephrased. Section 4.3.1 we have redone the experiments and have rewritten. **Lines 497 to 515 in the revised manuscript**

- 1.293: “gradually overlaps”: not very precise or clear. Do you mean the effect of DA is at a very short term (a few hours)?

**Response:** Yes, what you said is exactly what we want to express. The effect of assimilation gradually decreases with increasing time, which eventually leads to a gradual agreement in the trend of PM<sub>2.5</sub> concentration change between the control and assimilation tests. We have deleted the corresponding part in the manuscript. **Line 473 in the revised manuscript was deleted.**

- 1.296: “assimilating the initial field improves the PM<sub>2.5</sub> forecast field throughout the assimilation time window”: this is not very clear. The assimilation time window is 0 since DA is only performed for the initial field. This field is then used for simulating forecast for a given simulation length but no DA is performed during this period.

**Response:** Yes, thank you for kindly pointed out our problem. throughout the 24-h forecast time window. **Line 475 was deleted and corrected at lines 510 to 511 in the revised manuscript**

- 1.297: “strongest”: please quantify.

**Response:** Modified. **Line 511 in the revised manuscript**

- 1.297-303: what is the message?

**Response:** Here we want to emphasize that the larger the a priori initial field error is, the larger the impact of DA will be. So, we have given the example of 0000 UTC and 1200 UTC hours on 19 December. However, this example is inappropriate to be placed here and we have deleted it. **Line 476 to 483 in the revised manuscript were deleted.**

- 1.311-313: “assimilating the initial field [...] a significant impact”: all this is not clear for me. Please rephrase.

**Response:** We deleted this sentence. **Lines 490 to 493 in the revised manuscript were deleted.**

- 1.313-316: this concluding remark is very general and is not specific to the case study. It would be more logical to have it in the method section.

**Response:** Thanks to your suggestion. In order to make our content more logical, we have removed this part when rewriting it. Lines 492 to 495 was deleted in the revised manuscript.

- 1.322-323: same remark about the “discrete” DA fields as for the PM<sub>2.5</sub> concentrations.

**Response:** Rephrased. Lines 557 to 558 in the revised manuscript.

- 1.324-329: description of the Figure, not required in the text.

**Response:** The corresponding description in the manuscript has been modified. Lines 570 to 571 in the revised manuscript.

- 1.329-330: "It proves that [...]": what is the link with the DA discussed here?

**Response:** We wanted to show that the improvement of visibility by assimilated PM<sub>2.5</sub> is more pronounced in light pollution and weaker in heavy pollution, which is determined by the relationship between visibility and PM<sub>2.5</sub> in different pollution situations. But it is not appropriate to put it here, and we have removed that part. Lines 564 to 566 were deleted in the revised manuscript.

- 1.334seq: put elements about Figure 11 in the legend of said Figure.

**Response:** The legend of the figure has been added completely. Line 932 to 938 in the revised manuscript.

- 1.342: "It is obvious that": no, everything that is worth mentioning must be explained/demonstrated.

**Response:** Revisions were made to the original manuscript. Line 577 in the revised manuscript.

- 1.346: "the inaccuracy of the humidity simulation here and inaccurate visibility parameterization scheme for the model": wouldn't it be more relevant to improve the model than to perform DA? With a poorly adapted model, the impact of improving initial fields cannot be very large.

**Response:** Yes, you're right. Improving visibility parameterization schemes for models is an imperative issue. Visibility is influenced by relative humidity, aerosol particles, and meteorological elements. Various visibility parameterization schemes are approximations of visibility and are subject to errors. Through our evaluation of the GRAPES\_Meso5.1/CUACE model, we found that poor simulation of relative humidity at visibility below 10 km is a key factor affecting visibility forecasts (Wang et al., 2022). We are currently working on the issue of humidity assimilation, and we found that unlike the assimilation of chemical initial fields, the assimilation of meteorological initial fields (FNL data) in the atmospheric chemistry model can affect the relative humidity, PM<sub>2.5</sub>, and visibility forecasts for more than 48 h. Although bulk experimental discussions have not yet been conducted, we still believe that humidity assimilation is necessary for improving visibility forecasts. We have revised the summary in the manuscript as well. Lines 583 to 585 in the revised manuscript.

- 1.348-349: "other objects of assimilation": the priority really seems to be the improvement of the model.

**Response:** Thank you for your kind suggestion, the improvement of the model we have been working on in parallel. Like you said, the next step for us is to improve the model in addition to focusing on

assimilation.

#### Conclusion

- 1.364: "the DA can significantly improve the model initial field": see above 1) define what is significant 2) trivial if not evaluated against validation sites.

**Response:** Thank you for your suggestion, and we have made corrections to the manuscript. As shown in "Response 1.282-283", we have redone the experiment using only 50% observation sites and revised the manuscript.

- 1.369-370: "was most pronounced in the first 12 hours and gradually decreased": very vague statement for the actual result expected from the implementation of DA.

**Response:** Added quantitative descriptions in the Section 3.4.1 with Fig. 7. We find that the improvement receded with forecast time, changing from 46% at 1h forecast hour to 7% at 24h forecast hour. These results are consistent with previous study, which either used 4DVAR or EnKF (Wu et al. 2008; Bocquet et al, 2015, Park et al.,2022). As Bocquet et al. (2015) pointed out, even with the improved analysis, the impact of initial state adjustment is generally limited to the first day of the forecast, for pollutant transport and transformation are strongly driven by uncertain external parameters, such as emissions, deposition, boundary conditions, and meteorological fields.

- 1.372-373: "efficiency is highest with the largest distance between the model simulation and observation": here again, if the comparison is made against assimilated sites, it is trivial. The poorer the prior compared to the assimilated observations, the more spectacular the shift towards the observations after assimilation - provided there are no bugs in the implementation.

**Response:** Thank you very much for your suggestion. Yes, if no errors occur in the implementation, the worse the a priori is, the greater the improvement will be. China has a large area and the distribution of stations is not uniform. Assimilating only some of the sites would not update most of the area, so we assimilated all the sites when considering the impact of assimilation on the forecast field. However, after considering your suggestion, we have added a new experiment to investigate the effect of assimilation on the forecast field by assimilating only the DA sites shown in Figure 2 at 0000 UTC each day and analyzing the DA sites and the validation sites and the results are shown in Figure 7.

- 1.379-380: "but this positive correlation is not particularly obvious": a correlation is so much, it is not obvious or not.

**Response:** Thank you for pointing out our problem, this phrase has been revised. **Lines 614 to 615 in the revised manuscript.**

- 1.383-384: considering the improvements which could be done in the model and the difficulties of assimilating such data streams as satellite and surface together, this perspective seems very ambitious.

**Response:** Yes, thank you for the kind reminder. We did not realize the huge challenges involved, and perhaps we should start by improving the model itself, based on the present.

#### Tables and Figures

- Tables 2 and 3: please check the number of significant numbers.

**Response:** Thank you for the suggestion, we have checked the data appearing in the manuscript. and



rounded CORR to two decimal places, rounded other statistics to one decimal places.

- Figure 1: "ensemble generate": explain how; "calculate B": this is not shown in the equations; "C-B": what is C? It is not defined in the text when the reader is referred to the Fig; "verify assimilation result": how?

**Response:** Thank you for the reminder, the corresponding explanation is added in Section 2.2 of the manuscript. "ensemble generate" explain in lines 226 to 230, "verify assimilation result" in lines 222 to 225.

- Figure 4: "The num":? ; also make sure that all abbreviations are defined in the legend (same remark for all Figures)

**Response:** Thanks for your good suggestion. We have changed Figure 4 to Table 3.

- Figure 7: what is a "most serious" PM<sub>2.5</sub> pollution?

**Response:** We revised it to make it consistent with the statements in the manuscript. See "Response 1.265-266"

#### Technical corrections

- 1.158: "Fig. 1" -> should be Fig.2

**Response:** Thank you, and we have made revisions.

#### Ref:

Park, S. Y., Dash, U. K., Yu, J., Yumimoto, K., Uno, I., and Song, C. H.: Implementation of an ensemble Kalman filter in the Community Multiscale Air Quality model (CMAQ model v5.1) for data assimilation of ground-level PM<sub>2.5</sub>, *Geosci. Model Dev.*, 15, 2773-2790, 10.5194/gmd-15-2773-2022, 2022.

Emanuel, K. A.: Overview and Definition of Mesoscale Meteorology, in: *Mesoscale Meteorology and Forecasting*, edited by: Ray, P. S., American Meteorological Society, Boston, MA, 1-17, 10.1007/978-1-935704-20-1\_1, 1986.

Houtekamer, P. L. and Mitchell, H. L.: Data Assimilation Using an Ensemble Kalman Filter Technique, *Mon. Weather Rev.*, 126, 796-811, [https://doi.org/10.1175/1520-0493\(1998\)126<0796:DAUAEK>2.0.CO;2](https://doi.org/10.1175/1520-0493(1998)126<0796:DAUAEK>2.0.CO;2), 1998.

Wang, H., Zhang, X. Y., Wang, P., Peng, Y., Zhang, W. J., Liu, Z. D., Han, C., Li, S. T., Wang, Y. Q., Che, H. Z., Huang, L. P., Liu, H. L., Zhang, L., Zhou, C. H., Ma, Z. S., Chen, F. F., Ma, X., Wu, X. J., Zhang, B. H., and Shen, X. S.: Chemistry-Weather Interacted Model System GRAPES\_Meso5.1/CUACE CW V1.0: Development, Evaluation and Application in Better Haze/Fog Prediction in China, *Journal of Advances in Modeling Earth Systems*, 14, e2022MS003222, <https://doi.org/10.1029/2022MS003222>, 2022.

Zhang, L., Shao, J., Lu, X., Zhao, Y., Hu, Y., Henze, D. K., Liao, H., Gong, S., and Zhang, Q.: Sources and Processes Affecting Fine Particulate Matter Pollution over North China: An Adjoint Analysis of the Beijing APEC Period, *Environ. Sci. Technol.*, 50, 8731-8740, 10.1021/acs.est.6b03010, 2016.

Zhang, S., Tian, X., Zhang, H., Han, X., and Zhang, M.: A nonlinear least squares four-dimensional variational data assimilation system for PM<sub>2.5</sub> forecasts (NASM): Description and preliminary evaluation, *Atmospheric Pollution Research*, 12, 122-132, <https://doi.org/10.1016/j.apr.2021.03.003>,

2021.
